# Supplementary material for: High miR-30 Expression Associates with Improved Breast Cancer Patient Survival and Treatment Outcome
Source: MDPI journal article supplement (doi:10.3390/cancers13122907), 2021-06-10
Supplement: s1 [file s1]

# High miR-30 Expression Associates with Improved Breast Cancer Patient Survival and Treatment Outcome

Maral Jamshidi, Rainer Fagerholm, Taru A. Muranen, Sippy Kaur, Swapnil Potdar, Sofia Khan, Eliisa Netti, John-Patrick Mpindi, Bhagwan Yadav, Johanna I. Kiiski, Kristiina Aittomäki, Päivi Heikkilä, Jani Saarela, Ralf Bützow, Carl Blomqvist and Heli Nevanlinna

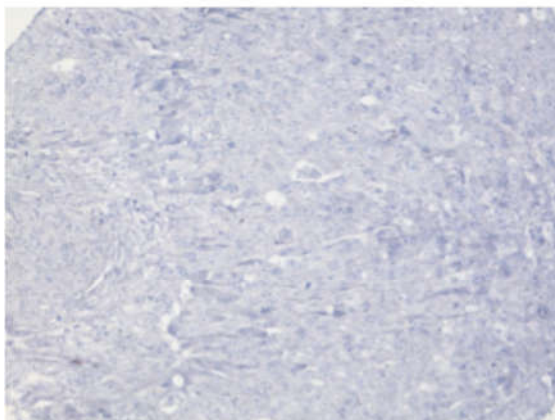

**Negative control**

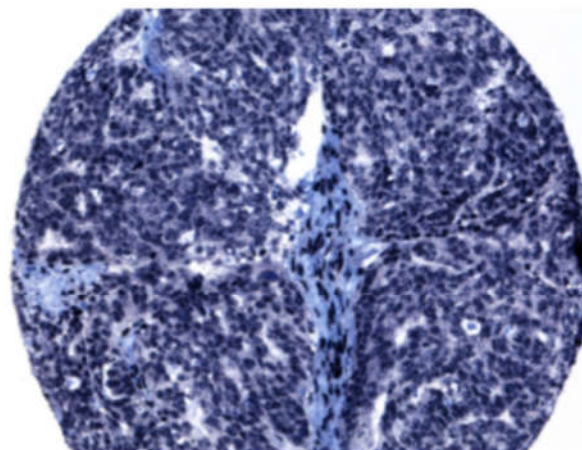

**Positive control**

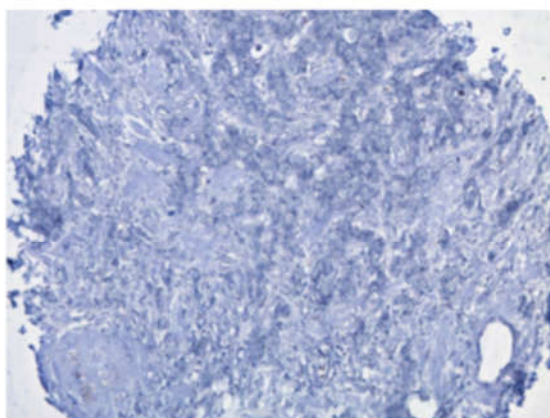

**miR-30d negative**

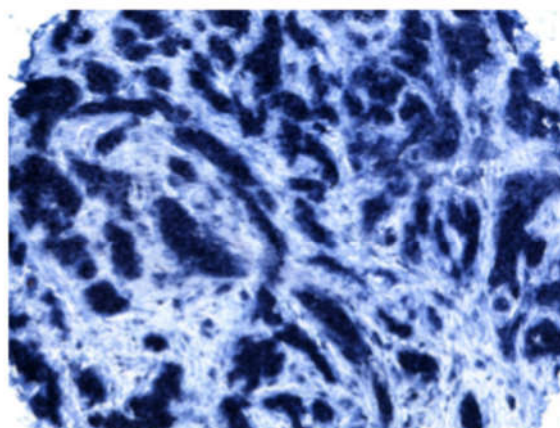

**miR-30d positive**

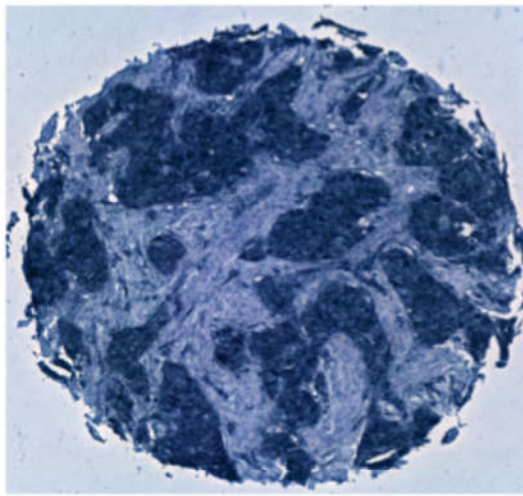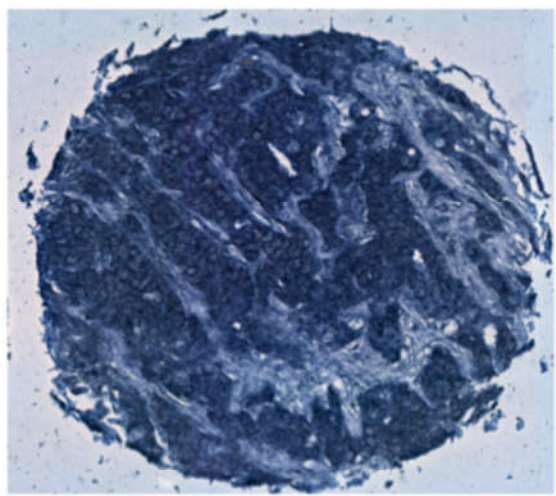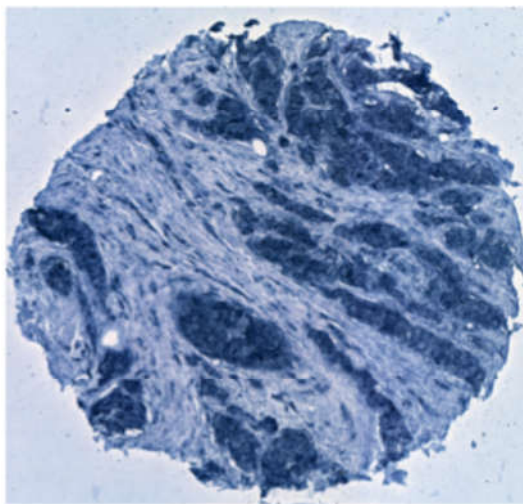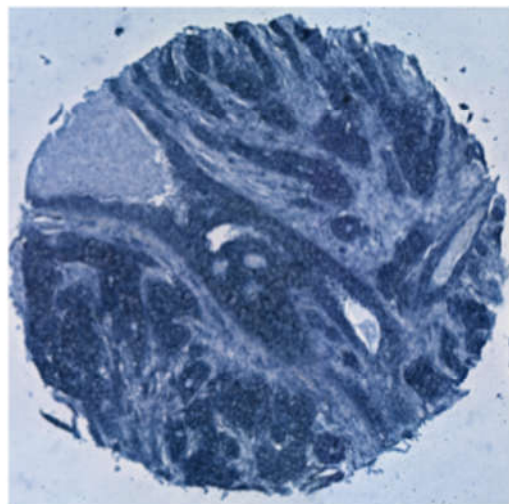

miR-30d positive (high expression)



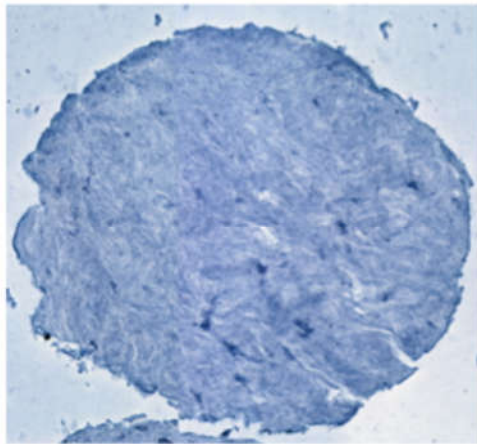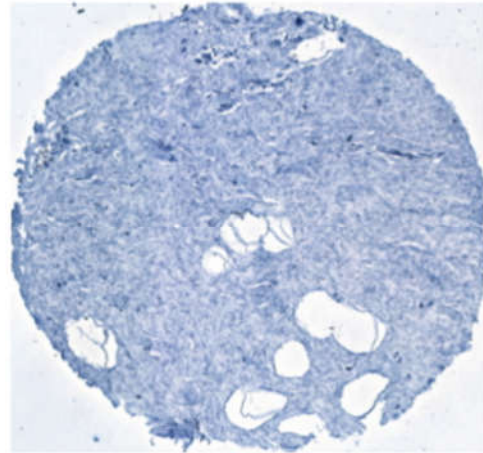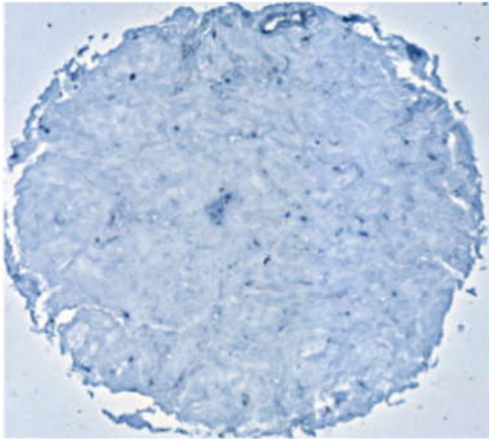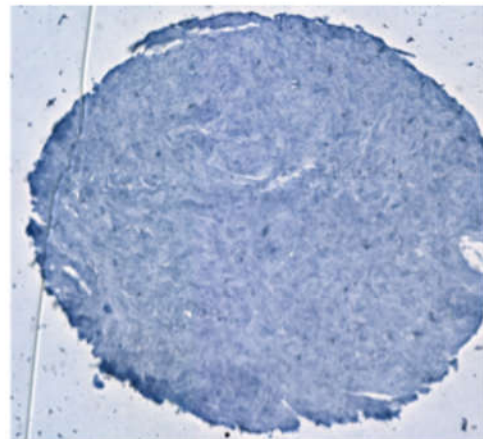

**miR-30d negative (low expression)**

**Figure S1** Samples of tumor microarray slides.

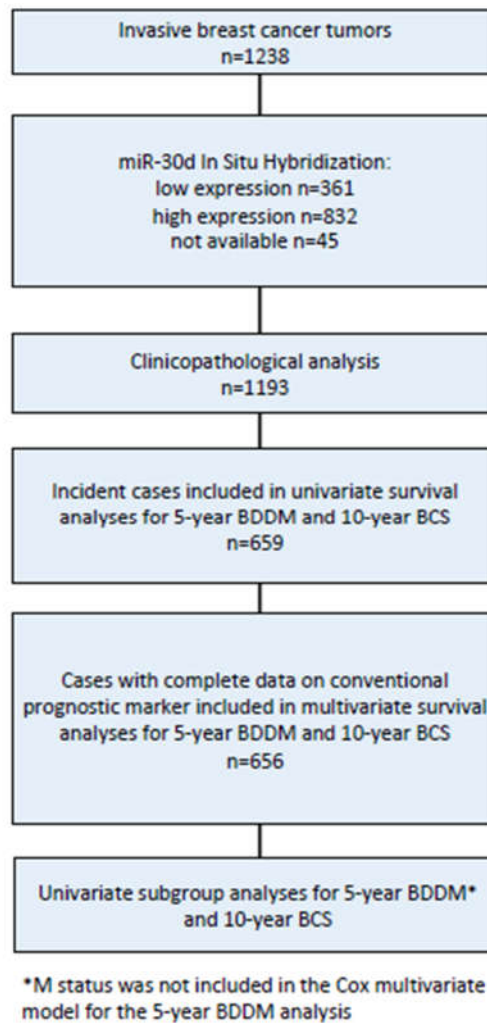

**Figure S2:** Flow chart of the samples' inclusion criteria in various statistical analyses.

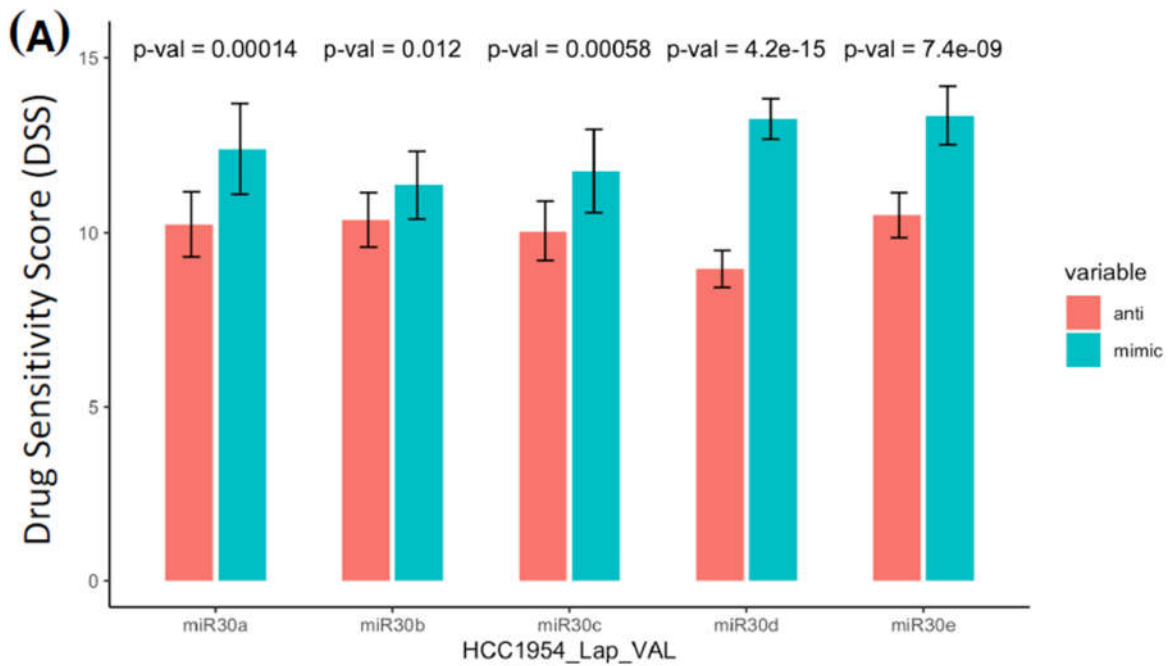

### HCC1954 cell lines treated with lapatinib

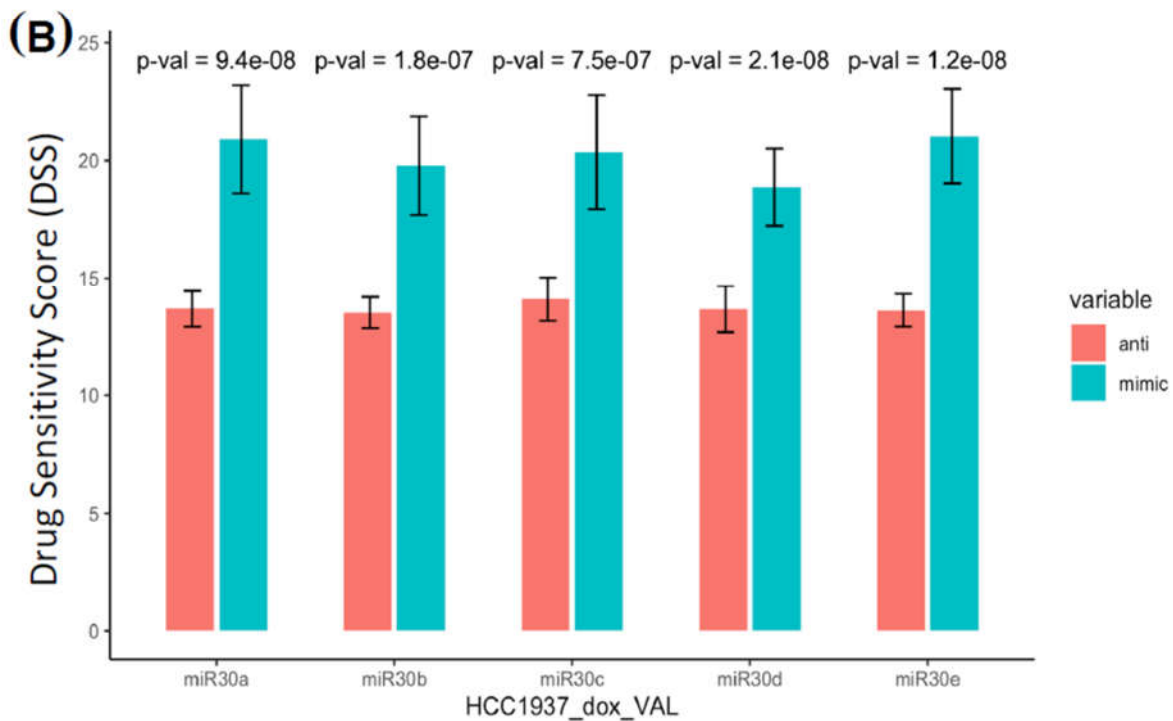

### HCC1937 cell lines treated with doxorubicin

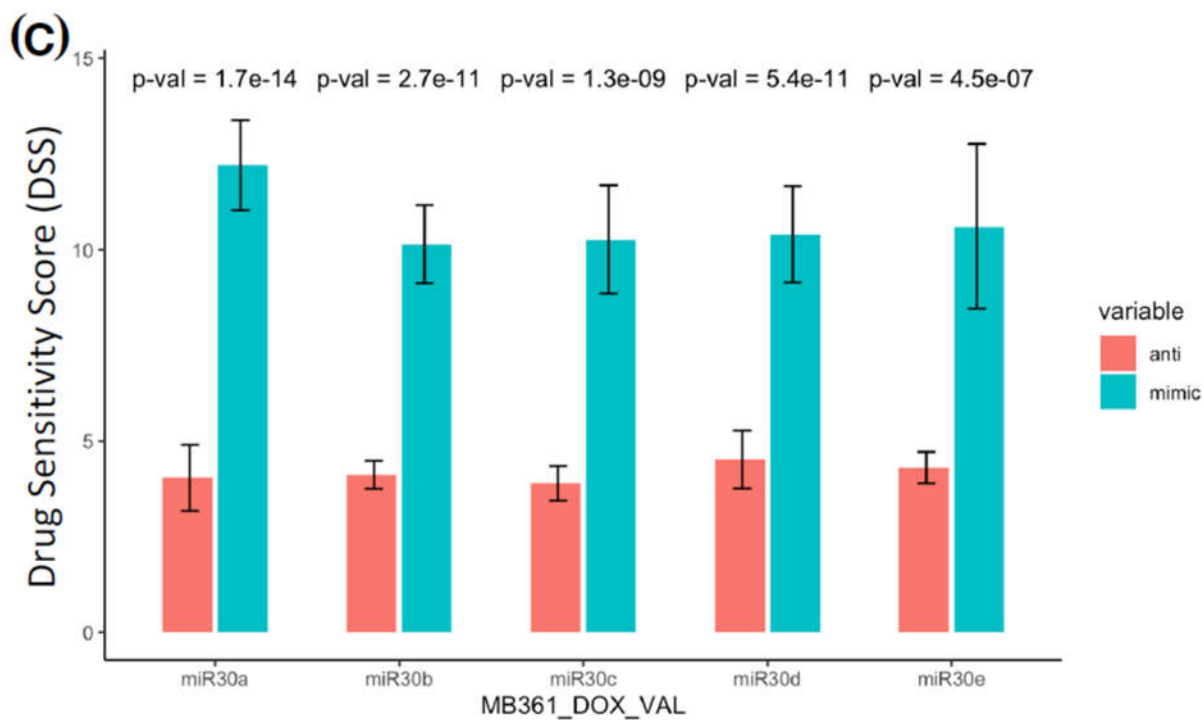

### MDA-MB-361 cell lines treated with doxorubicin

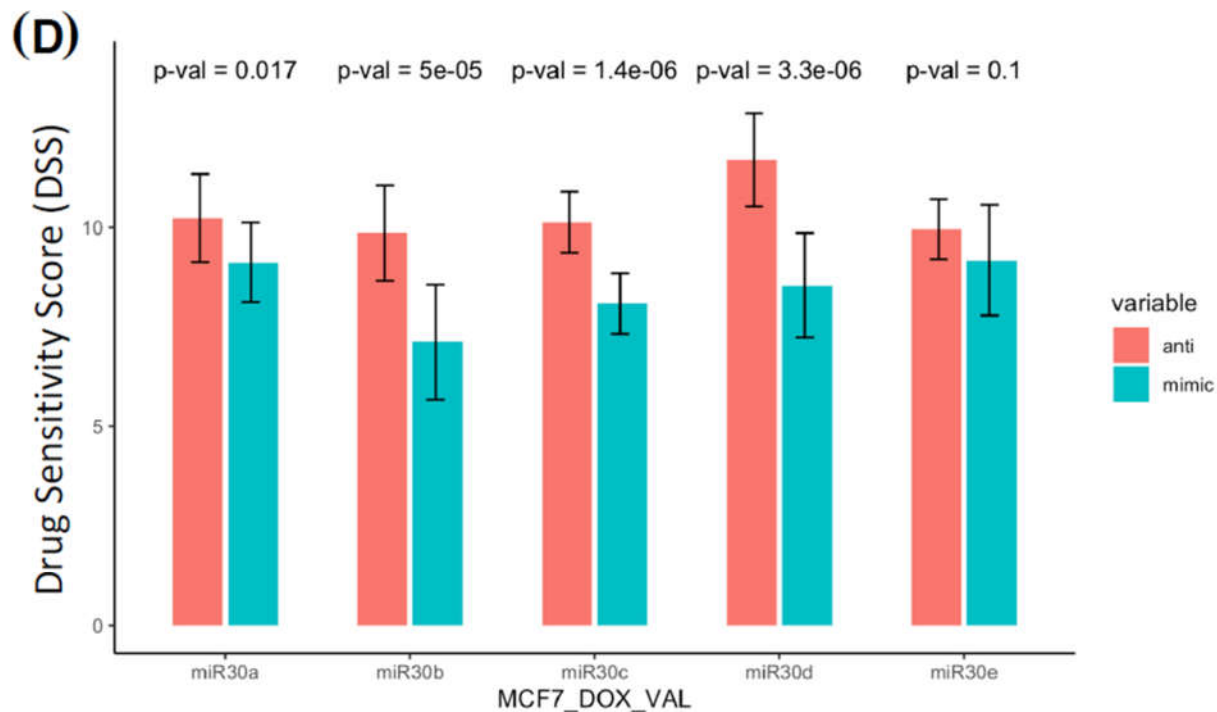

### MCF7 cell lines treated with doxorubicin

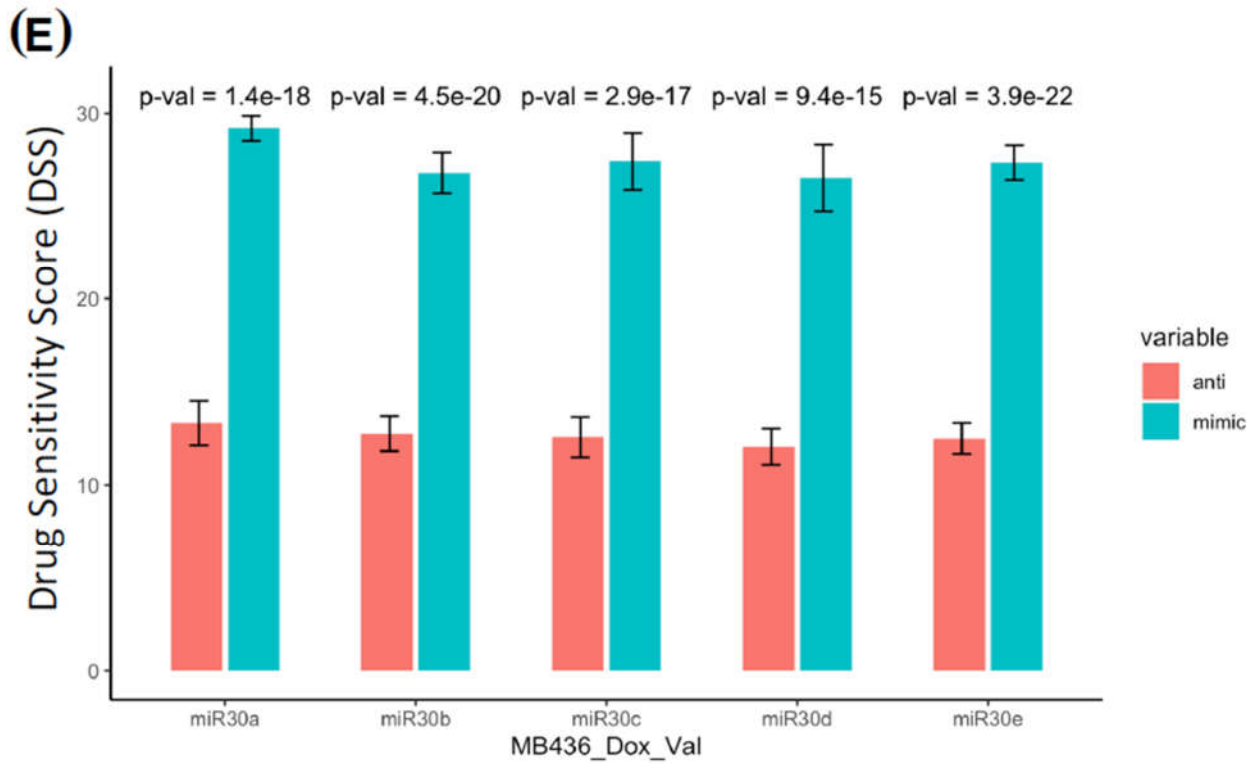

### MDA-MB-436 cell lines treated with doxorubicin

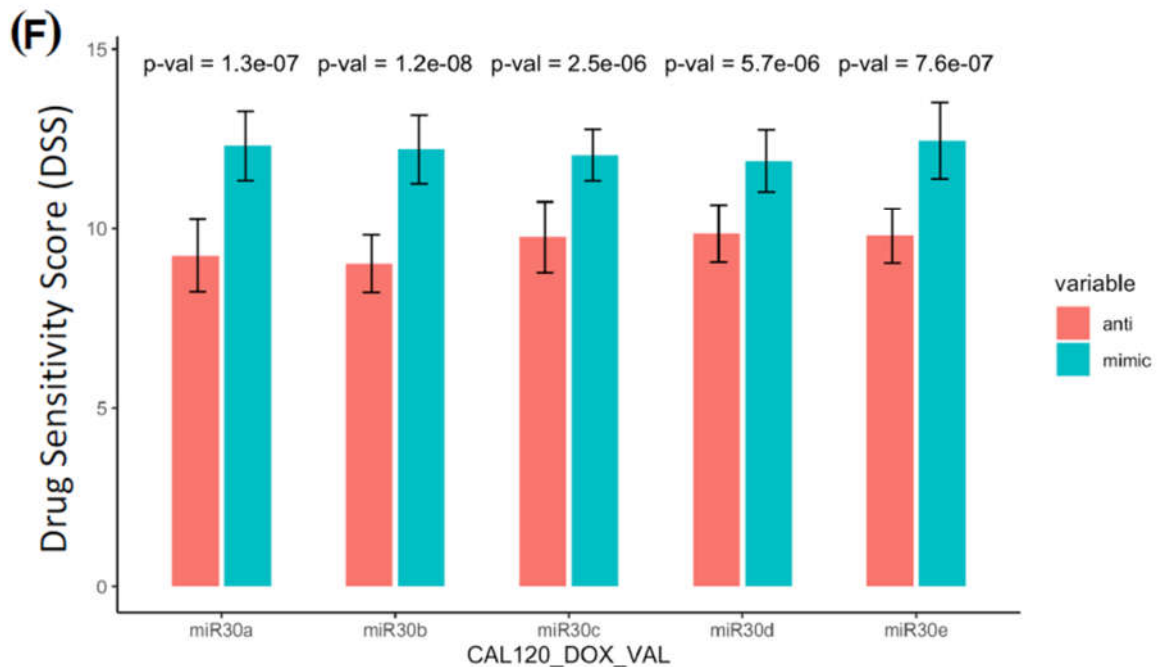

### CAL120 cell lines treated with doxorubicin

**Figure S3.** Replication round of drug screening test: DSS for cells transfected with miR-30 family member-specific mimics and inhibitors. Compared to their inhibitors, the miR-30 mimics sensitized the breast cancer cell lines to doxorubicin and lapatinib. Higher DSS score indicates increased drug sensitivity. Dox: doxorubicin, Lap: Lapatinib, VAL: validation, MB361: MDA-MB-361, MB436: MDA-MB-436 cell line.

**Table S1.** List of the specific miRNA-mimics and miRNA-inhibitors for each miR-30 family member.

| miRNA          | Product type            | Ambion ID | Mature miRNA Sequence   |
|----------------|-------------------------|-----------|-------------------------|
| hsa-miR-30a-5p | mirVana miRNA mimic     | MC11062   | UGUAAACAUCCUCGACUGGAAG  |
| hsa-miR-30a-5p | mirVana miRNA inhibitor | MH11062   | UGUAAACAUCCUCGACUGGAAG  |
| hsa-miR-30b-5p | mirVana miRNA mimic     | MC10986   | UGUAAACAUCCUACACUCAGCU  |
| hsa-miR-30b-5p | mirVana miRNA inhibitor | MH10986   | UGUAAACAUCCUACACUCAGCU  |
| hsa-miR-30c-5p | mirVana miRNA mimic     | MC11060   | UGUAAACAUCCUACACUCUCAGC |
| hsa-miR-30c-5p | mirVana miRNA inhibitor | MH11060   | UGUAAACAUCCUACACUCUCAGC |
| hsa-miR-30d-5p | mirVana miRNA mimic     | MC10756   | UGUAAACAUCCCCGACUGGAAG  |
| hsa-miR-30d-5p | mirVana miRNA inhibitor | MH10756   | UGUAAACAUCCCCGACUGGAAG  |
| hsa-miR-30e-5p | mirVana miRNA mimic     | MC10037   | UGUAAACAUCCUUGACUGGAAG  |
| hsa-miR-30e-5p | mirVana miRNA inhibitor | MH10037   | UGUAAACAUCCUUGACUGGAAG  |

**Table S2.** Association of miR-30d expression with the clinical and pathological features of tumors of incident cases. (n, %)

|                                                                                 | <i>Total</i> | <i>miR-30d Low</i> | <i>miR-30d High</i> | <i>p</i> |
|---------------------------------------------------------------------------------|--------------|--------------------|---------------------|----------|
| <i>Tumour histology</i>                                                         |              |                    |                     |          |
| Ductal carcinomas                                                               | 452          | 125                | 327                 | 0.008    |
|                                                                                 | 68.6%        | 61.0%              | 72.0%               |          |
| Lobular carcinomas                                                              | 126          | 54                 | 72                  |          |
|                                                                                 | 19.1%        | 26.3%              | 15.9%               |          |
| Medullary carcinomas                                                            | 7            | 1                  | 6                   |          |
|                                                                                 | 1.1%         | .5%                | 1.3%                |          |
| Other                                                                           | 74           | 25                 | 49                  |          |
|                                                                                 | 11.2%        | 12.2%              | 10.8%               |          |
| <i>Grade</i>                                                                    |              |                    |                     |          |
| 1                                                                               | 154          | 57                 | 97                  | 0.008    |
|                                                                                 | 23.5%        | 28.2%              | 21.5%               |          |
| 2                                                                               | 295          | 98                 | 197                 |          |
|                                                                                 | 45.1%        | 48.5%              | 43.6%               |          |
| 3                                                                               | 205          | 47                 | 158                 |          |
|                                                                                 | 31.3%        | 23.3%              | 35.0%               |          |
| <i>Tumor size</i>                                                               |              |                    |                     |          |
| 1                                                                               | 370          | 119                | 251                 | 0.264    |
|                                                                                 | 56.4%        | 58.3%              | 55.5%               |          |
| 2                                                                               | 243          | 68                 | 175                 |          |
|                                                                                 | 37.0%        | 33.3%              | 38.7%               |          |
| 3                                                                               | 21           | 10                 | 11                  |          |
|                                                                                 | 3.2%         | 4.9%               | 2.4%                |          |
| 4                                                                               | 22           | 7                  | 15                  |          |
|                                                                                 | 3.4%         | 3.4%               | 3.3%                |          |
| <i>Nodal status (development of nodal metastasis at diagnosis)</i>              |              |                    |                     |          |
| Negative                                                                        | 335          | 115                | 220                 | 0.063    |
|                                                                                 | 51.2%        | 56.7%              | 48.8%               |          |
| positive                                                                        | 319          | 88                 | 231                 |          |
|                                                                                 | 48.8%        | 43.3%              | 51.2%               |          |
| <i>Metastasis at diagnosis (development of distant metastasis at diagnosis)</i> |              |                    |                     |          |
| Negative                                                                        | 633          | 196                | 437                 | 0.660    |
|                                                                                 | 96.2%        | 95.6%              | 96.5%               |          |
| Positive                                                                        | 25           | 9                  | 16                  |          |
|                                                                                 | 3.8%         | 4.4%               | 3.5%                |          |
| <i>ER status</i>                                                                |              |                    |                     |          |
| Negative                                                                        | 127          | 36                 | 91                  | 0.522    |



|                                                 |       |       |       |       |
|-------------------------------------------------|-------|-------|-------|-------|
|                                                 | 19.6% | 18.0% | 20.3% |       |
| Positive                                        | 521   | 164   | 357   |       |
|                                                 | 80.4% | 82.0% | 79.7% |       |
| <i>PR status</i>                                |       |       |       |       |
| Negative                                        | 220   | 73    | 147   | 0.419 |
|                                                 | 33.9% | 36.3% | 32.8% |       |
| Positive                                        | 429   | 128   | 301   |       |
|                                                 | 66.1% | 63.7% | 67.2% |       |
| <i>p53 tumor status</i>                         |       |       |       |       |
| Negative                                        | 497   | 155   | 342   | 0.080 |
|                                                 | 79.6% | 84.2% | 77.7% |       |
| Positive                                        | 127   | 29    | 98    |       |
|                                                 | 20.4% | 15.8% | 22.3% |       |
| <i>HER2 status</i>                              |       |       |       |       |
| Negative                                        | 541   | 170   | 371   | 0.093 |
|                                                 | 86.8% | 90.4% | 85.3% |       |
| Positive                                        | 82    | 18    | 64    |       |
|                                                 | 13.2% | 9.6%  | 14.7% |       |
| <i>Ki67 tumor status (proliferation marker)</i> |       |       |       |       |
| Negative                                        | 398   | 135   | 263   | 0.023 |
|                                                 | 61.1% | 67.8% | 58.2% |       |
| Positive                                        | 253   | 64    | 189   |       |
|                                                 | 38.9% | 32.2% | 41.8% |       |
| <i>SubTypes</i>                                 |       |       |       |       |
| ER/PR pos and HER2 neg                          | 453   | 147   | 306   | 0.054 |
|                                                 | 73.9% | 79.9% | 71.3% |       |
| ER/PR pos and HER2 pos                          | 47    | 7     | 40    |       |
|                                                 | 7.7%  | 3.8%  | 9.3%  |       |
| ER/PR neg and HER2 pos                          | 35    | 11    | 24    |       |
|                                                 | 5.7%  | 6.0%  | 5.6%  |       |
| ER neg and PR neg and HER2 neg                  | 78    | 19    | 59    |       |
|                                                 | 12.7% | 10.3% | 13.8% |       |

Low=None or weak cytoplasmic staining, High=moderate or high cytoplasmic staining.

**Table S3.** Univariate Cox's regression analysis by miR-30d in all patients, and in patients subgrouped by ER, HER2, Ki67, p53, and chemotherapy status for (A) 5-years BDDM (breast cancer death or distant metastasis), and (B) 10-year BCS (breast cancer survival) among incident cases.

| Category      | 5-year BDDM       |          |         |      |           |
|---------------|-------------------|----------|---------|------|-----------|
|               | miR-30d n(event)* |          | p value | HR   | 95% CI    |
|               | Low               | High     |         |      |           |
| A)            |                   |          |         |      |           |
| All patients  | 205 (45)          | 451 (66) | 0.019   | 0.63 | 0.44-0.93 |
| ER-negative   | 36 (16)           | 89 (18)  | 0.006   | 0.38 | 0.19-0.76 |
| ER-positive   | 164 (29)          | 356 (48) | 0.208   | 0.74 | 0.46-1.18 |
| HER2-negative | 170 (32)          | 371 (50) | 0.107   | 0.68 | 0.44-1.07 |
| HER2-positive | 18 (12)           | 61 (15)  | 0.001   | 0.27 | 0.12-0.59 |
| Ki67-negative | 135 (19)          | 261 (32) | 0.598   | 0.85 | 0.48-1.51 |
| Ki67-positive | 64 (26)           | 188 (34) | 0.0002  | 0.38 | 0.23-0.64 |
| p53-negative  | 155 (29)          | 340 (44) | 0.106   | 0.67 | 0.42-1.07 |
| p53-positive  | 29 (13)           | 97 (21)  | 0.011   | 0.41 | 0.20-0.81 |

|                  |                    |          |        |      |           |
|------------------|--------------------|----------|--------|------|-----------|
| No chemotherapy  | 131 (22)           | 254 (32) | 0.285  | 0.74 | 0.43-1.28 |
| Chemotherapy     | 74 (23)            | 196 (34) | 0.011  | 0.49 | 0.29-0.84 |
| No-Anthracycline | 32 (8)             | 102 (17) | 0.246  | 0.61 | 0.26-1.41 |
| Anthracycline    | 42 (15)            | 94 (17)  | 0.023  | 0.44 | 0.22-0.89 |
| <b>B)</b>        | <b>10-year BCS</b> |          |        |      |           |
| All patients     | 205 (41)           | 451 (58) | 0.018  | 0.61 | 0.41-0.92 |
| ER-negative      | 36 (14)            | 89 (17)  | 0.015  | 0.41 | 0.20-0.84 |
| ER-positive      | 164 (27)           | 356 (41) | 0.126  | 0.68 | 0.46-1.11 |
| HER2-negative    | 170 (29)           | 371 (45) | 0.197  | 0.68 | 0.42-1.08 |
| HER2-positive    | 18 (11)            | 61 (12)  | 0.0006 | 0.24 | 0.10-0.54 |
| Ki67-negative    | 135 (20)           | 261 (30) | 0.291  | 0.73 | 0.41-1.29 |
| Ki67-positive    | 64 (21)            | 188 (28) | 0.002  | 0.41 | 0.23-0.73 |
| p53-negative     | 155 (26)           | 340 (37) | 0.075  | 0.62 | 0.37-1.03 |
| p53-positive     | 29 (11)            | 97 (20)  | 0.043  | 0.46 | 0.22-0.97 |
| No chemotherapy  | 131 (22)           | 254 (27) | 0.112  | 0.63 | 0.36-1.11 |
| Chemotherapy     | 74 (19)            | 196 (31) | 0.045  | 0.55 | 0.31-0.98 |
| No-Anthracycline | 32 (8)             | 102 (17) | 0.255  | 0.61 | 0.26-1.42 |
| Anthracycline    | 42 (11)            | 94 (14)  | 0.131  | 0.54 | 0.24-1.21 |

**Table S4.** Applying Drug Sensitivity Score (DSS) to compare miR-30 family member mimics with their inhibitors using student *t*-test.

| Screening round | cell line | Type        | Treatment   | miR30 member | p_value  | stderr | lower 95%CI | upper 95%CI |
|-----------------|-----------|-------------|-------------|--------------|----------|--------|-------------|-------------|
| First           | HCC1954   | HER2pos     | Lapatinib   | miR30a       | 1.08E-04 | 0.51   | 2.57        | 4.93        |
| First           | HCC1954   | HER2pos     | Lapatinib   | miR30b       | 1.08E-04 | 0.51   | 2.57        | 4.93        |
| First           | HCC1954   | HER2pos     | Lapatinib   | miR30c       | 1.10E-04 | 0.49   | 2.12        | 4.35        |
| First           | HCC1954   | HER2pos     | Lapatinib   | miR30d       | 9.34E-05 | 0.34   | 1.4         | 2.9         |
| First           | HCC1954   | HER2pos     | Lapatinib   | miR30e       | 9.68E-04 | 0.71   | 1.9         | 5.14        |
| Second          | HCC1954   | HER2pos     | Lapatinib   | miR30a       | 1.38E-04 | 0.46   | 1.2         | 3.13        |
| Second          | HCC1954   | HER2pos     | Lapatinib   | miR30b       | 1.16E-02 | 0.36   | 0.25        | 1.75        |
| Second          | HCC1954   | HER2pos     | Lapatinib   | miR30c       | 5.76E-04 | 0.42   | 0.85        | 2.62        |
| Second          | HCC1954   | HER2pos     | Lapatinib   | miR30d       | 4.20E-15 | 0.23   | 3.84        | 4.78        |
| Second          | HCC1954   | HER2pos     | Lapatinib   | miR30e       | 7.44E-09 | 0.3    | 2.21        | 3.48        |
| First           | HCC1937   | Triple Neg  | Doxorubicin | miR30a       | 1.07E-06 | 0.7    | 6.23        | 9.4         |
| First           | HCC1937   | Triple Neg  | Doxorubicin | miR30b       | 2.40E-05 | 0.71   | 3.61        | 6.79        |
| First           | HCC1937   | Triple Neg  | Doxorubicin | miR30c       | 1.26E-05 | 0.72   | 3.67        | 6.81        |
| First           | HCC1937   | Triple Neg  | Doxorubicin | miR30d       | 6.67E-06 | 0.66   | 3.22        | 6.06        |
| First           | HCC1937   | Triple Neg  | Doxorubicin | miR30e       | 4.82E-08 | 0.7    | 5.27        | 8.25        |
| Second          | HCC1937   | Triple Neg  | Doxorubicin | miR30a       | 9.36E-08 | 0.7    | 5.72        | 8.73        |
| Second          | HCC1937   | Triple Neg  | Doxorubicin | miR30b       | 1.78E-07 | 0.63   | 4.89        | 7.62        |
| Second          | HCC1937   | Triple Neg  | Doxorubicin | miR30c       | 7.47E-07 | 0.75   | 4.65        | 7.85        |
| Second          | HCC1937   | Triple Neg  | Doxorubicin | miR30d       | 2.15E-08 | 0.55   | 4.04        | 6.36        |
| Second          | HCC1937   | Triple Neg  | Doxorubicin | miR30e       | 1.15E-08 | 0.61   | 6.1         | 8.73        |
| First           | MB361     | ER+PR+HER2+ | Doxorubicin | miR30a       | 5.04E-09 | 0.36   | 5.97        | 7.56        |
| First           | MB361     | ER+PR+HER2+ | Doxorubicin | miR30b       | 2.50E-09 | 0.3    | 5.07        | 6.4         |
| First           | MB361     | ER+PR+HER2+ | Doxorubicin | miR30c       | 2.26E-13 | 0.23   | 5.74        | 6.74        |
| First           | MB361     | ER+PR+HER2+ | Doxorubicin | miR30d       | 1.63E-05 | 0.52   | 3.4         | 5.8         |
| First           | MB361     | ER+PR+HER2+ | Doxorubicin | miR30e       | 1.18E-09 | 0.35   | 5.93        | 7.47        |

|        |         |                     |             |        |          |      |       |       |
|--------|---------|---------------------|-------------|--------|----------|------|-------|-------|
| Second | MB361   | ER+PR+HER2+         | Doxorubicin | miR30a | 1.72E-14 | 0.42 | 7.29  | 9.05  |
| Second | MB361   | ER+PR+HER2+         | Doxorubicin | miR30b | 2.72E-11 | 0.32 | 5.35  | 6.7   |
| Second | MB361   | ER+PR+HER2+         | Doxorubicin | miR30c | 1.29E-09 | 0.43 | 5.44  | 7.29  |
| Second | MB361   | ER+PR+HER2+         | Doxorubicin | miR30d | 5.41E-11 | 0.43 | 4.99  | 6.78  |
| Second | MB361   | ER+PR+HER2+         | Doxorubicin | miR30e | 4.46E-07 | 0.63 | 4.92  | 7.68  |
| First  | MCF7    | ER+PR+HER2-P53-wild | Doxorubicin | miR30a | 9.65E-01 | 1.26 | -2.93 | 3.04  |
| First  | MCF7    | ER+PR+HER2-P5t-wild | Doxorubicin | miR30b | 5.16E-02 | 0.92 | -4.02 | 0.02  |
| First  | MCF7    | ER+PR+HER2-P5t-wild | Doxorubicin | miR30c | 1.77E-01 | 0.8  | -2.93 | 0.62  |
| First  | MCF7    | ER+PR+HER2-P5t-wild | Doxorubicin | miR30d | 1.07E-03 | 0.71 | -4.3  | -1.3  |
| First  | MCF7    | ER+PR+HER2-P5t-wild | Doxorubicin | miR30e | 4.88E-02 | 1.31 | 0.02  | 5.8   |
| Second | MCF7    | ER+PR+HER2-P5t-wild | Doxorubicin | miR30a | 1.68E-02 | 0.43 | -2.01 | -0.22 |
| Second | MCF7    | ER+PR+HER2-P5t-wild | Doxorubicin | miR30b | 4.99E-05 | 0.54 | -3.87 | -1.62 |
| Second | MCF7    | ER+PR+HER2-P5t-wild | Doxorubicin | miR30c | 1.42E-06 | 0.31 | -2.7  | -1.4  |
| Second | MCF7    | ER+PR+HER2-P5t-wild | Doxorubicin | miR30d | 3.25E-06 | 0.51 | -4.2  | -2.1  |
| Second | MCF7    | ER+PR+HER2-P5t-wild | Doxorubicin | miR30e | 1.02E-01 | 0.46 | -1.76 | 0.18  |
| Second | CAL 120 | Triple Neg          | Doxorubicin | miR30a | 1.28E-07 | 0.4  | 2.24  | 3.91  |
| Second | CAL 120 | Triple Neg          | Doxorubicin | miR30b | 1.17E-08 | 0.36 | 2.45  | 3.95  |
| Second | CAL 120 | Triple Neg          | Doxorubicin | miR30c | 2.51E-06 | 0.36 | 1.57  | 3.05  |
| Second | CAL 120 | Triple Neg          | Doxorubicin | miR30d | 5.72E-06 | 0.34 | 1.32  | 2.74  |
| Second | CAL 120 | Triple Neg          | Doxorubicin | miR30e | 7.62E-07 | 0.38 | 1.88  | 3.46  |
| Second | MB436   | Triple Neg          | Doxorubicin | miR30a | 1.45E-18 | 0.4  | 15.02 | 16.7  |
| Second | MB436   | Triple Neg          | Doxorubicin | miR30b | 4.50E-20 | 0.42 | 13.17 | 14.9  |
| Second | MB436   | Triple Neg          | Doxorubicin | miR30c | 2.91E-17 | 0.54 | 13.71 | 15.97 |
| Second | MB436   | Triple Neg          | Doxorubicin | miR30d | 9.36E-15 | 0.59 | 13.23 | 15.7  |
| Second | MB436   | Triple Neg          | Doxorubicin | miR30e | 3.88E-22 | 0.36 | 14.08 | 15.57 |

---

**Table S5.** Results of the Ingenuity Pathway Analysis of genes correlated with the expression of the miR-30 family miRNAs.

|                        | miRNA target filter analysis |                                                                                      |                                                                               | Core analysis                               |                                                                                                                  | Notes on the METABRIC-IPA analysis                                                                                                               |
|------------------------|------------------------------|--------------------------------------------------------------------------------------|-------------------------------------------------------------------------------|---------------------------------------------|------------------------------------------------------------------------------------------------------------------|--------------------------------------------------------------------------------------------------------------------------------------------------|
|                        | n filtered target genes      | Top disease                                                                          | Top function                                                                  | n correlated genes                          | Top function                                                                                                     |                                                                                                                                                  |
| <b>hsa-miR-30a-5p</b>  | 23                           | Carcinoma<br>23/23 target genes<br>p-value of overlap<br>3.2E-7                      | Migration of cells<br>9/23 target genes<br>p-value of overlap<br>2.2E-3       | 479<br>(313 positively<br>166 negatively)   | Cell movement of breast cancer<br>cell lines<br>27 genes<br>activation z-score -1.6<br>p-value of overlap 4.0E-6 |                                                                                                                                                  |
| <b>hsa-miR-30a-3p</b>  | 31                           | Breast or gynecological cancer<br>20/31 target genes<br>p-value of overlap<br>5.4E-7 | Cell movement<br>16/31 target genes<br>p-value of overlap<br>1.3E-6           | 1975<br>(995 positively<br>980 negatively)  | Cell movement - predicted decreased<br>471 genes<br>activation z-score -5.0<br>p-value of overlap 2.0E-20        |                                                                                                                                                  |
| <b>hsa-miR-30b-5p</b>  | 27                           | Abdominal carcinoma<br>26/27 target genes<br>p-value of overlap<br>2.6E-8            | Cell movement<br>13/27 target genes<br>p-value of overlap<br>5.6E-5           | 568<br>(288 positively<br>280 negatively)   | Cell movement - predicted decreased<br>165 genes<br>activation z-score -4.8<br>p-value of overlap 9.1E-13        |                                                                                                                                                  |
| <b>hsa-miR-30b-3p</b>  | 15                           | Epithelial neoplasm<br>14/15 target genes<br>p-value of overlap<br>7.5E-4            | Development of cytoplasm<br>4/15 target genes<br>p-value of overlap<br>6.1E-4 | 212<br>(114 positively<br>98 negatively)    | Development of cytoplasm<br>16 genes<br>activation z-score -1.7<br>p-value of overlap 1.6E-3                     | A_25_P00013382 probe for hsa-miR-30b-3p has very low signal in the METABRIC, suggesting that this is the inactive strand with short half-life.   |
| <b>hsa-miR-30c-5p</b>  | 67                           | Carcinoma<br>62/67 target genes<br>p-value of overlap<br>3.2E-13                     | Migration of cells<br>25/67 target genes<br>p-value of overlap<br>4.2E-7      | 1868<br>(867 positively<br>1001 negatively) | Migration of cells - predicted decreased<br>409 genes<br>activation z-score -5.0<br>p-value of overlap 6.7E-20   |                                                                                                                                                  |
| <b>hsa-miR-30c1-3p</b> | 0                            |                                                                                      |                                                                               | 1<br>(1 positively<br>0 negatively)         |                                                                                                                  | A_25_P00013489 probe for hsa-miR-30c-1-3p has very low signal in the METABRIC, suggesting that this is the inactive strand with short half-life. |

|                        |    |                                                                          |                                                                      |                                            |                                                                                                                |                                                                                                                                                                                                                                                                                                                           |
|------------------------|----|--------------------------------------------------------------------------|----------------------------------------------------------------------|--------------------------------------------|----------------------------------------------------------------------------------------------------------------|---------------------------------------------------------------------------------------------------------------------------------------------------------------------------------------------------------------------------------------------------------------------------------------------------------------------------|
| <b>hsa-miR-30c2-3p</b> | 61 | Carcinoma<br>57/61 target genes<br>p-value of overlap<br>9.4E-12         | Cell movement<br>29/61 target genes<br>p-value of overlap<br>8.7E-10 | 1817<br>(916 positively<br>901 negatively) | Cell movement - predicted de-<br>creased<br>437 genes<br>activation z-score -5.0<br>p-value of overlap 1.0E-19 |                                                                                                                                                                                                                                                                                                                           |
| <b>hsa-miR-30d-5p</b>  | 0  |                                                                          |                                                                      | 83<br>(83 positively<br>0 negatively)      |                                                                                                                | A_25_P00010683 probe for hsa-miR-30d-5p has a good expression signal in the METABRIC. However, the probe sequence is a perfect match to a lncRNA transcript AC004263.1-201/ENST000000617183.1 and lncRNA transcript AL022318.1-201/ENST000000450216.1, which if expressed in the METABRIC tumors, may be an error source. |
| <b>hsa-miR-30d-3p</b>  | 0  |                                                                          |                                                                      | 121<br>(92 positively<br>29 negatively)    |                                                                                                                | A_25_P00013291 probe for hsa-miR-30d-3p has very low signal in the METABRIC, suggesting that this is the inactive strand with short half-life.                                                                                                                                                                            |
| <b>hsa-miR-30e-5p</b>  | 0  |                                                                          |                                                                      | 1<br>(1 positively<br>0 negatively)        |                                                                                                                | A_25_P00012300 probe for hsa-miR-30e-5p and A_25_P00014611 probe for hsa-miR-30e-3p have both good expres-                                                                                                                                                                                                                |
| <b>hsa-miR-30e-3p</b>  | 21 | Incidence of tumor<br>16/21 target genes<br>p-value of overlap<br>3.3E-5 | Cell movement<br>10/21 target genes<br>p-value of overlap<br>3.2E-4  | 1234<br>(593 positively<br>641 negatively) | Cell movement - predicted de-<br>creased<br>271 genes<br>activation z-score -2.3<br>p-value of overlap 3.8E-8  | sion signal in the METABRIC. The correlation between the two probes was very low (Pearson's R -0.05), suggesting that 5' and 3' sequences have high expression in different tumors.                                                                                                                                       |
